# Supplementary material
Source: PubMed Central journal article supplement (PMC9933734)
Supplement: aac.01307-22-s0001.pdf [file aac.01307-22-s0001.pdf]

## Supplemental material for

### Title

High-resolution bacterial cytological profiling reveals intrapopulation morphological variations upon antibiotic exposure

### Authors

Thanadon Samernate,<sup>1</sup> Htut Htut Htoo,<sup>1</sup> Joseph Sugie,<sup>2</sup> Warinthorn Chavasiri,<sup>3</sup> Joe Pogliano,<sup>2</sup> Vorrapon Chaikerasitak,<sup>4</sup> Poochit Nonejuie<sup>1\*</sup>

<sup>1</sup> Institute of Molecular Biosciences, Mahidol University, Nakhon Pathom, Thailand

<sup>2</sup> Division of Biological Sciences, University of California, San Diego, La Jolla, California, USA

<sup>3</sup> Center of Excellence in Natural Products Chemistry, Department of Chemistry, Chulalongkorn University, Bangkok, Thailand

<sup>4</sup> Department of Biochemistry, Faculty of Science, Chulalongkorn University, Bangkok, Thailand

\* Correspondence: [poochit.non@mahidol.ac.th](mailto:poochit.non@mahidol.ac.th)

### This PDF file includes:

Figures S1 to S4

Tables S1 to S3

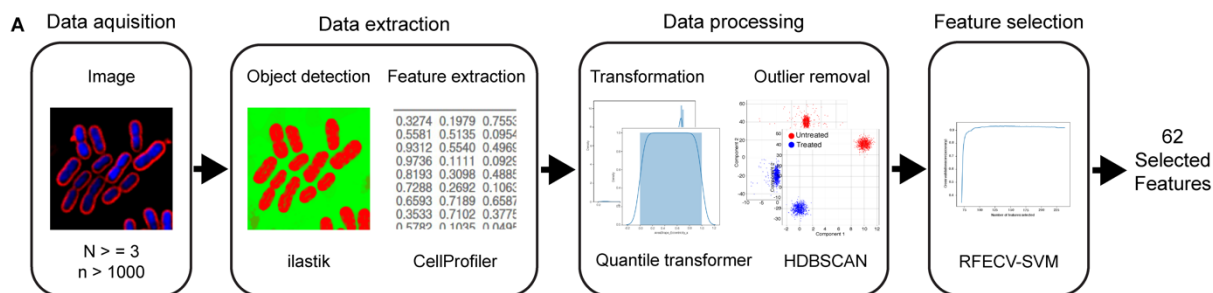

**B**

| Accuracy = 0.9297   |                    |           |        |          |
|---------------------|--------------------|-----------|--------|----------|
|                     | MOA profile by BCP | Precision | Recall | F1-score |
| Minocycline (MIN)   | P1                 | 0.97      | 0.91   | 0.94     |
| Amikacin (AMI)      | P2                 | 0.88      | 0.96   | 0.92     |
| Piperacillin (PIP)  | C1                 | 1.00      | 0.97   | 0.99     |
| Meropenem (MER)     | C2                 | 0.99      | 0.99   | 0.99     |
| Ciprofloxacin (CIP) | D1                 | 0.95      | 1.00   | 0.98     |
| Rifampicin (RIF)    | R1                 | 0.93      | 0.91   | 0.92     |
| Triclosan (TCS)     | L1                 | 0.84      | 0.85   | 0.84     |
| Colistin (CST)      | M1                 | 0.86      | 0.91   | 0.89     |
| Untreated           |                    | 0.95      | 0.86   | 0.90     |

**Figure S1. Feature selection pipeline for single antibiotic treatment and cell profile classification accuracy**

(A) Data flow of cell feature selection starting from image acquisition, data extraction via ilastik and CellProfiler, data transformation and outlier removal, and feature selection via RFECE-SVM machine learning model. (B) Precision table of single cell profile classification using 62 features selected by RFECE-SVM.

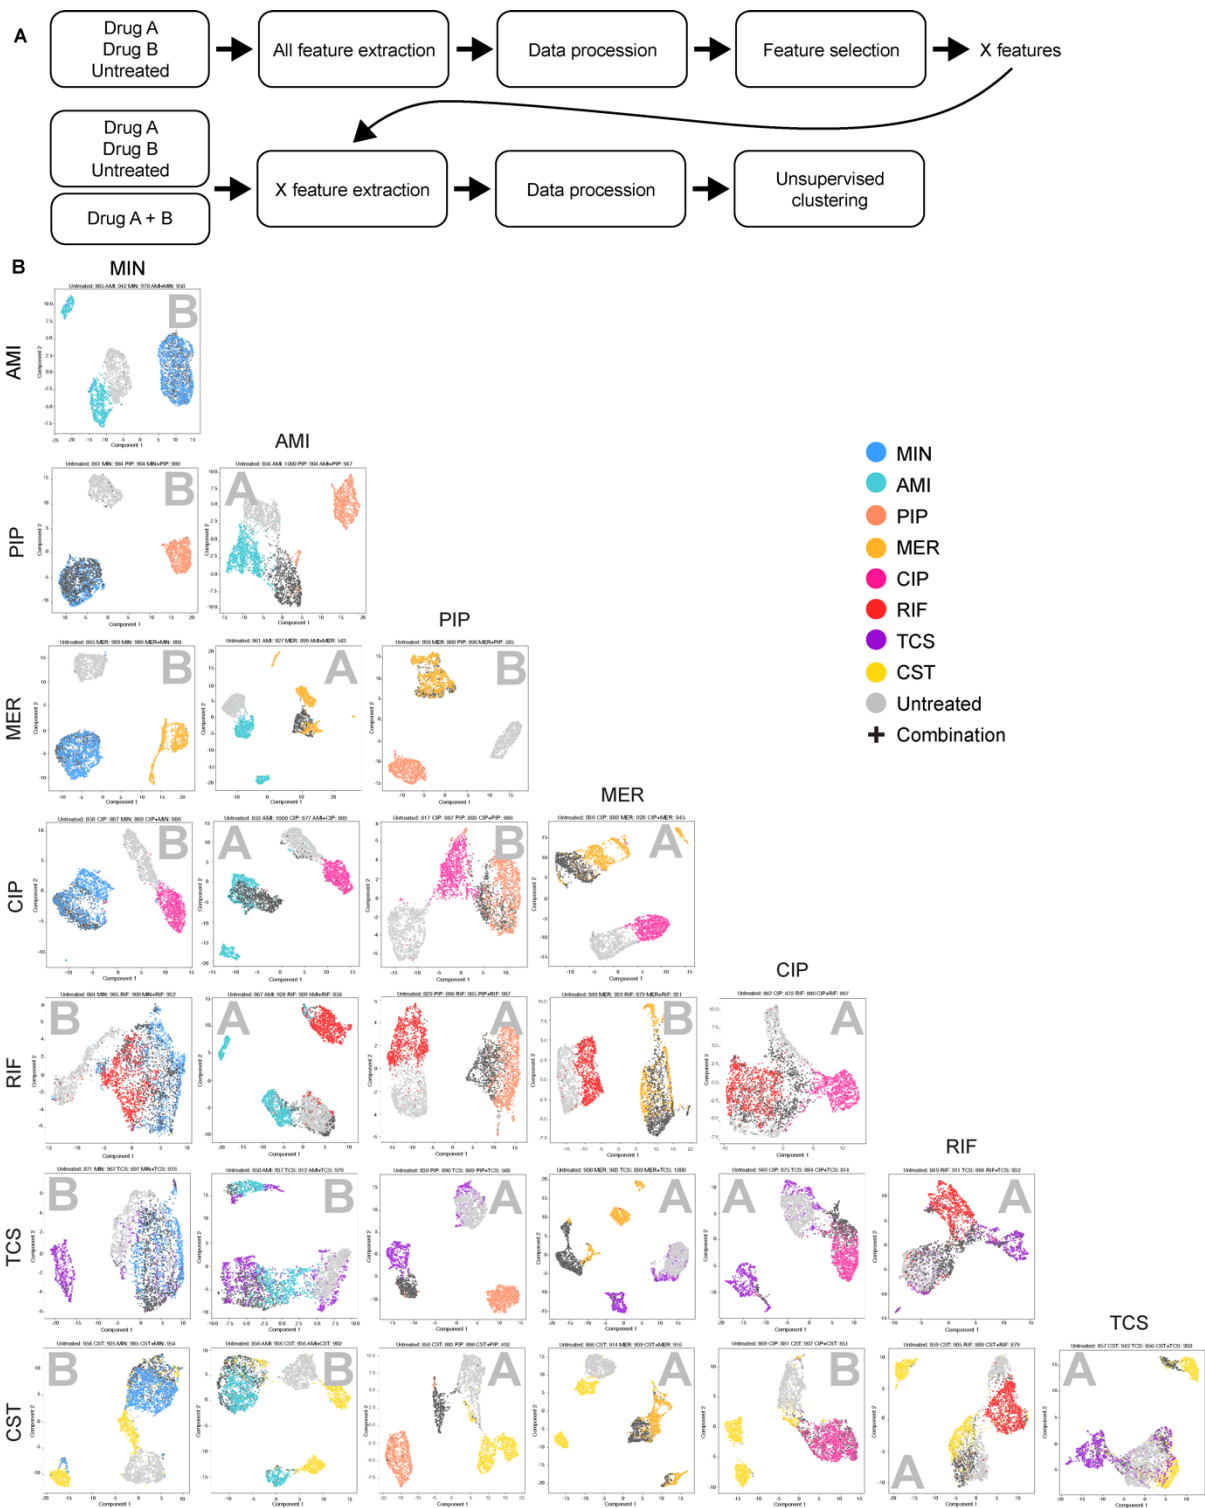

**Figure S2. Feature selection pipeline for antibiotic combination treatment and the profiles of all combinations**

(A) Data flow of cell feature selection from two antibiotics and unsupervised data analysis of antibiotic combination profiles. (B) PaCMAP plots of all 28 combination with designated combination type (Type A and B) indicated.

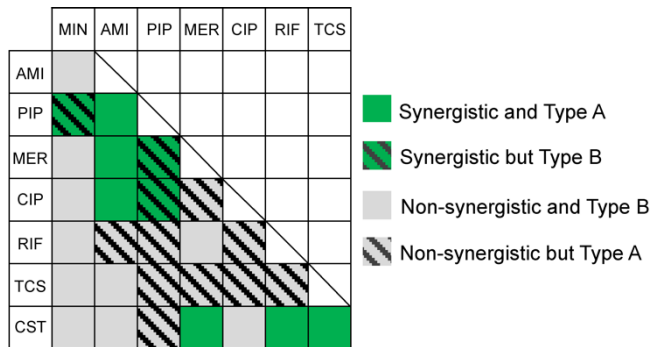

**Figure S3. Combinatorial profile types and synergism of antibiotic pairs**  
Drug interaction is synergistic when the  $\Sigma$  FICs is  $\leq 0.5$ , otherwise it is non-synergistic.

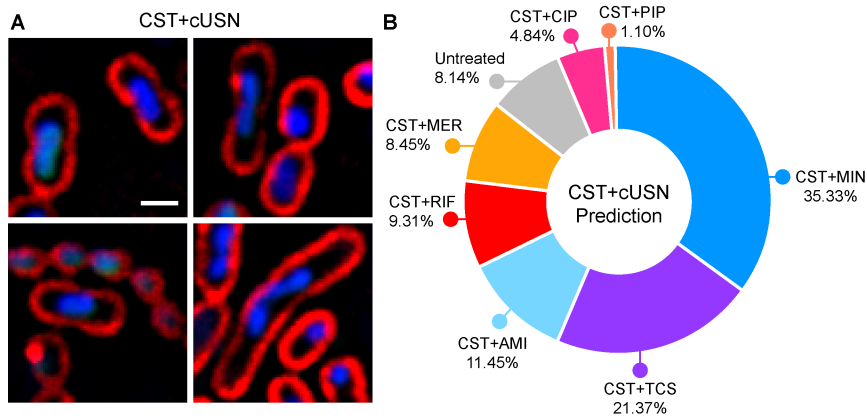

**Figure S4. Cells treated with commercial usnic acid (cUSN) in combination with colistin (CST) resulted in multiple morphological changes and were classified into multiple antibiotic combinations**

(A) Representative cell images of CST+cUSN-treated cells showing multiple morphological changes. *A. baumannii* cells treated with 0.25 x MIC of CST + 250  $\mu$ M cUSN for 1 hour. Scale bar represents 1  $\mu$ m. (B) CST+cUSN-treated cells were classified into different profiles by the predictive mode.

**Table S1.** Table showing the antibiotics used in this study, their MIC, their MOA profiles and cellular pathways inhibited.

| <b>Antibiotic name</b> | <b>MIC (<math>\mu\text{g/mL}</math>)</b> | <b>MOA profile by BCP</b> | <b>Cellular pathway</b> |
|------------------------|------------------------------------------|---------------------------|-------------------------|
| Minocycline (MIN)      | 0.50                                     | P1                        | Protein translation     |
| Amikacin (AMI)         | 4.00                                     | P2                        |                         |
| Piperacillin (PIP)     | 40.00                                    | C1                        | Cell wall synthesis     |
| Meropenem (MER)        | 0.45                                     | C2                        |                         |
| Ciprofloxacin (CIP)    | 0.45                                     | D1                        | DNA replication         |
| Rifampicin (RIF)       | 1.00                                     | R1                        | RNA transcription       |
| Triclosan (TCS)        | 0.05                                     | L1                        | Lipid synthesis         |
| Colistin (CST)         | 0.62                                     | M1                        | Membrane integrity      |







**Table S3.** Table showing the antibacterial activity of natural product-derived compounds against *B. subtilis* and *A. baumannii*.

| Natural product-derived compounds | MIC ( $\mu\text{M}$ ) |                     | FIC ( $\mu\text{M}$ ) (+ 0.25xMIC CST) |
|-----------------------------------|-----------------------|---------------------|----------------------------------------|
|                                   | <i>B. subtilis</i>    | <i>A. baumannii</i> | <i>A. baumannii</i>                    |
| Anacardic acid                    | <b>31.5</b>           | > 500               | > 500                                  |
| Chrysin                           | > 500                 | > 500               | > 500                                  |
| $\alpha$ -Mangostin               | <b>7.8</b>            | > 500               | > 500                                  |
| Mansonone G                       | <b>15.6</b>           | > 500               | > 500                                  |
| Melodorinone B                    | > 500                 | > 500               | > 500                                  |
| Methyl 4-hydroxybenzoate          | > 500                 | > 500               | > 500                                  |
| Phenoxyethanol                    | > 500                 | > 500               | > 500                                  |
| Pinostrobin                       | > 500                 | > 500               | > 500                                  |
| Piperic acid                      | > 500                 | > 500               | > 500                                  |
| Piperine                          | > 500                 | > 500               | > 500                                  |
| Usnic acid (USN)                  | <b>1.5</b>            | > 500               | <b>250</b>                             |
| Commercial usnic acid (cUSN)      | <b>1.5</b>            | > 500               | <b>250</b>                             |
